# Supplementary material
Source: bioRxiv or medRxiv preprint supplement (https://www.biorxiv.org/content/biorxiv/early/2022/11/01/2022.10.31.514576/DC1/embed/media-1.pdf)
Supplement: Supplementary file [file media-1.pdf]

Supplementary Fig S1

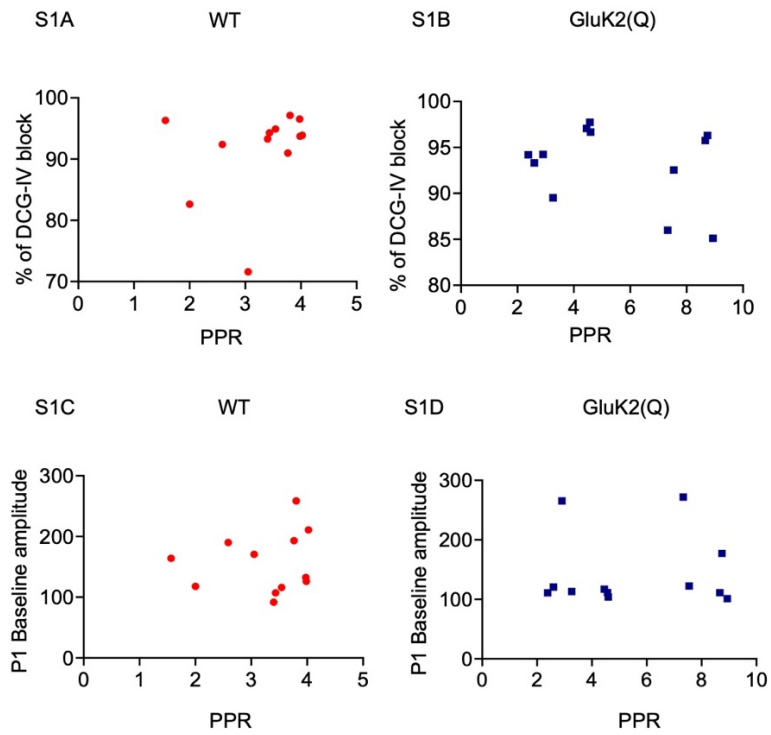

**Supplementary Figure S1:**

**(S1A)** Pearson's correlation between PPR and percentage of DCGIV block in WT and **(S1B)** GluK2(Q) mice. **(S1C)** PPR and P1 baseline amplitudes of WT and **(S1D)** GluK2(Q) mice, N=7, n=13 cells; Tg, N=8, n=15 cells. WT, N=7, n=13 cells; Tg, N=8, n=15 cells.
